# Supplementary material for: Pharmaceuticals and Personal Care Products across Different Water Bodies in Taihu Lake Basin, China: Occurrence, Source, and Flux
Source: MDPI journal article supplement (doi:10.3390/ijerph191711135), 2022-09-05
Supplement: s1 [file s1]

**Pharmaceuticals and Personal Care Products across Different Water Bodies in Taihu Lake  
Basin, China: Occurrence, Source, and Flux**

**Supplemental Material:**

| <b>Content:</b> |                                                                                     |
|-----------------|-------------------------------------------------------------------------------------|
| SM-1            | Figure S1. Schematic diagrams of the treatment processes in the two WWTPs.          |
| SM-2            | Figure S2. PPCP concentrations in the different land use types in four seasons.     |
| SM-3            | Table S1. Physicochemical property and molecular of target PPCPs.                   |
| SM-4            | Table S2. Each sampling site with corresponding river and sub-region of Taihu Lake. |
| SM-5            | Table S3. Parameter settings of solid phase extraction.                             |
| SM-6            | Table S4. Mobile phase elution procedures.                                          |
| SM-7            | Table S5. Mass spectrometry conditions for 13 PPCPs.                                |
| SM-8            | Table S6. The mean removal rates of PPCPs in three processes used by two WWTPs.     |

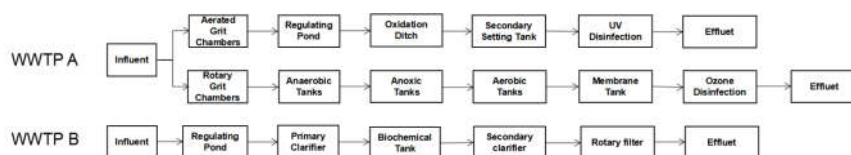

**Figure S1.** Schematic diagrams of the treatment processes in the two WWTPs.

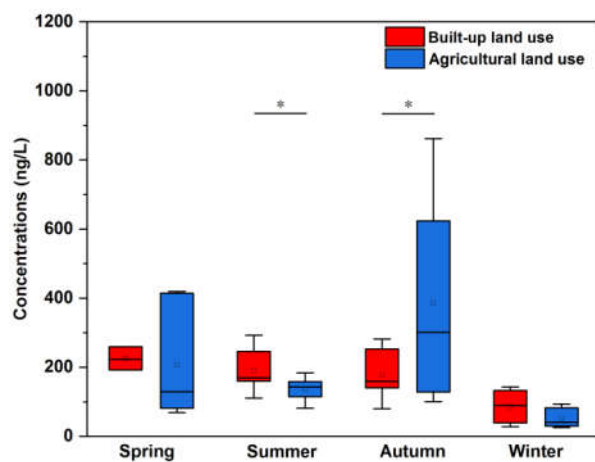

**Figure S2.** PPCP concentrations in different land use types in four seasons. The symbols “\*” indicate statistically significant difference at 0.05 level (two-tailed).

**Table S1.** Physicochemical property and molecular of target PPCPs.

| Compound       | Abbreviation | CAS Number  | Molecular Formula                                              | Relative Molecular Mass | log $K_{ow}$ |
|----------------|--------------|-------------|----------------------------------------------------------------|-------------------------|--------------|
| roxithromycin  | ROX          | 80214-83-1  | C <sub>41</sub> H <sub>76</sub> N <sub>2</sub> O <sub>15</sub> | 837.05                  | 3.1          |
| clarithromycin | CLR          | 81103-11-9  | C <sub>38</sub> H <sub>69</sub> NO <sub>13</sub>               | 747.95                  | 3.2          |
| fluoxetine     | FLX          | 54910-89-3  | C <sub>17</sub> H <sub>18</sub> F <sub>3</sub> NO              | 309.33                  | 4.0          |
| citalopram     | CTP          | 219861-08-2 | C <sub>20</sub> H <sub>21</sub> FN <sub>2</sub> O              | 324.39                  | 3.2          |
| sertraline     | SER          | 79617-96-2  | C <sub>17</sub> H <sub>17</sub> Cl <sub>2</sub> N              | 306.23                  | 4.8          |
| metoprolol     | MTL          | 37350-58-6  | C <sub>15</sub> H <sub>25</sub> NO <sub>3</sub>                | 267.36                  | 1.9          |
| bezafibrate    | BZB          | 41859-67-0  | C <sub>19</sub> H <sub>20</sub> ClNO <sub>4</sub>              | 361.82                  | 3.8          |

|                          |      |            |                                                                 |        |      |
|--------------------------|------|------------|-----------------------------------------------------------------|--------|------|
| gemfibrozil              | GFB  | 25812-30-0 | C <sub>15</sub> H <sub>22</sub> O <sub>3</sub>                  | 250.33 | 3.8  |
| n, n-diethyl-m-toluamide | DEET | 134-62-3   | C <sub>12</sub> H <sub>17</sub> NO                              | 191.27 | 2.0  |
| triclocarban             | TCC  | 101-20-2   | C <sub>13</sub> H <sub>9</sub> Cl <sub>3</sub> N <sub>2</sub> O | 315.58 | 5.3  |
| clotrimazole             | CTM  | 23593-75-1 | C <sub>22</sub> H <sub>17</sub> ClN <sub>2</sub>                | 344.84 | 5.0  |
| caffeine                 | CFI  | 58-08-2    | C <sub>8</sub> H <sub>10</sub> N <sub>4</sub> O <sub>2</sub>    | 194.19 | -0.1 |
| carbamazepine            | CBZ  | 298-46-4   | C <sub>15</sub> H <sub>12</sub> N <sub>2</sub> O                | 236.27 | 2.5  |

**Table S2.** Each sampling site with corresponding river and sub-region of Taihu Lake.

| Environmental Compartments | Sampling Sites | Location             |
|----------------------------|----------------|----------------------|
| WWTPs                      | WWTP A         | 120.3343°E,31.6107°N |
|                            | WWTP B         | 120.8467°E,31.6123°N |
| Rivers                     | R1             | 120.8296°E,31.7805°N |
|                            | R2             | 120.7985°E,31.7611°N |
|                            | R3             | 120.6433°E,31.6518°N |
|                            | R4             | 120.5998°E,31.5379°N |
|                            | R5             | 120.5709°E,31.5044°N |
|                            | R6             | 120.4193°E,31.4515°N |
|                            | R7             | 120.8985°E,31.7806°N |
|                            | R8             | 120.7622°E,31.5992°N |
|                            | R9             | 120.5057°E,31.3343°N |
|                            | R10            | 120.8223°E,31.6938°N |
|                            | R11            | 120.3573°E,31.4734°N |
|                            | R12            | 120.1278°E,31.5071°N |
|                            | R13            | 120.0371°E,31.4989°N |
|                            | R14            | 120.0102°E,31.4604°N |

|            |     |                      |
|------------|-----|----------------------|
| Taihu Lake | R15 | 120.0106°E,31.4281°N |
|            | R16 | 119.9536°E,31.3603°N |
|            | R17 | 119.9315°E,31.3212°N |
|            | L1  | 120.0472°E,31.4258°N |
|            | L2  | 120.1728°E,31.4686°N |
|            | L3  | 120.1622°E,31.3966°N |
|            | L4  | 120.2462°E,31.3789°N |
|            | L5  | 120.3757°E,31.4478°N |
|            | L6  | 120.2453°E,31.5156°N |
|            | L7  | 120.2292°E 31.3103°N |
|            | L8  | 120.2697°E 31.2328°N |
|            | L9  | 120.4590°E 31.1717°N |
|            | L10 | 119.9639°E 31.3111°N |
|            | L11 | 119.9583°E 31.2167°N |
|            | L12 | 120.0119°E 31.1364°N |
|            | L13 | 120.1347°E 30.9931°N |
|            | L14 | 120.0257°E 31.0664°N |
|            | L15 | 120.2996°E 31.0017°N |
|            | L16 | 120.0969°E 31.3333°N |
|            | L17 | 120.1033°E 31.2258°N |
|            | L18 | 120.1505°E 31.0628°N |
|            | L19 | 120.2676°E 31.0136°N |
|            | L20 | 120.1897°E 31.1347°N |

**Table S3.** Parameter settings of solid phase extraction.

| Operation      | Solvent                    | Flow (mL/min) | volume (mL) |
|----------------|----------------------------|---------------|-------------|
| Condition      | methanol                   | 5             | 5           |
|                | ultrapure water            | 5             | 5           |
| Sample loading | sample                     | 10            | 1000        |
| Elute          | methanol                   | 5             | 5           |
|                | Methanol:acetone (v/v 1:1) | 5             | 5           |

**Table S4.** Mobile phase elution procedures.

| Gradient (min) | Flow (mL/min) | Mobile Phase A % | Mobile Phase B % |
|----------------|---------------|------------------|------------------|
| 0              | 0.4           | 90               | 10               |
| 0.25           | 0.4           | 90               | 10               |
| 3.00           | 0.4           | 5                | 95               |
| 4.00           | 0.4           | 5                | 95               |
| 4.01           | 0.4           | 90               | 10               |
| 5              | 0.4           | 90               | 10               |

Mobile phase A: 0.1% formic acid; Mobile phase B: 100% acetonitrile.

**Table S5.** Mass spectrometry conditions for 13 PPCPs.

| Compound | Retention<br>Time (ms) | Precursor<br>Ion (m/z) | Product<br>Ions (m/z) | Cone<br>Voltage<br>(V) | Collision<br>Energy (eV) | Modes |
|----------|------------------------|------------------------|-----------------------|------------------------|--------------------------|-------|
| ROX      | 7                      | 837.50                 | 158.0                 | 37                     | 30                       | ESI+  |
| CLR      | 7                      | 748.40                 | 158.20                | 40                     | 30                       | ESI+  |
| FLX      | 7                      | 310.13                 | 43.99                 | 6                      | 10                       | ESI+  |
|          |                        |                        | 147.99                |                        | 8                        |       |
| CTP      | 8                      | 325.10                 | 108.93                | 38                     | 26                       | ESI+  |
|          |                        |                        | 262.03                |                        | 20                       |       |
| SER      | 11                     | 306.10                 | 158.86                | 20                     | 26                       | ESI+  |
|          |                        |                        | 274.97                |                        | 12                       |       |
| MTL      | 36                     | 268.2                  | 116.0                 | 30                     | 18                       | ESI+  |
|          |                        |                        | 133.0                 |                        | 24                       |       |
| BZB      | 27                     | 360.27                 | 153.90                | 26                     | 26                       | ESI-  |
|          |                        |                        | 274.03                |                        | 16                       |       |
| GFB      | 70                     | 251.03                 | 82.95                 | 18                     | 12                       | ESI+  |
|          |                        |                        | 128.93                |                        | 10                       |       |
| DEET     | 27                     | 192.13                 | 90.93                 | 38                     | 28                       | ESI+  |
|          |                        |                        | 118.95                |                        | 18                       |       |
| TCC      | 70                     | 314.97                 | 161.85                | 28                     | 16                       | ESI-  |
|          |                        |                        | 162.17                |                        | 26                       |       |
| CTM      | 17                     | 277.07                 | 160.94                | 42                     | 20                       | ESI+  |
|          |                        |                        | 164.98                |                        | 22                       |       |
| CFI      | 45                     | 195.07                 | 110.03                | 40                     | 24                       | ESI+  |
|          |                        |                        | 138.04                |                        | 22                       |       |
| CBZ      | 7                      | 236.97                 | 165.0                 | 30                     | 42                       | ESI+  |
|          |                        |                        | 178.87                |                        | 34                       |       |

**Table S6.** The mean removal rates of PPCPs in three processes used by two WWTPs.

| Compound | Removal Rates (%) in WWTP A |             | Removal Rates (%) in WWTP B |
|----------|-----------------------------|-------------|-----------------------------|
|          | OD Process                  | MBR Process | A <sup>2</sup> O Process    |
| ROX      | −289.4                      | −29.1       | −892.4                      |
| CLR      | /                           | /           | −1593.8                     |
| MTL      | −66.2                       | 57.6        | 77.9                        |
| BZB      | 100.0                       | 100.0       | −142.9                      |
| GFB      | /                           | /           | 56.7                        |
| DEET     | 82.6                        | 82.2        | −320.8                      |
| CFI      | 98.6                        | 97.6        | 77.6                        |
| CBZ      | −104.6                      | −38.8       | −244.5                      |
